# Supplementary material
Source: Research Square preprint supplement (doi:10.21203/rs.3.rs-9438981/v1)
Supplement: Supplementary file 1 [file f57927f690c675ce8cc01fd1.pdf]

```

import pandas as pd
import numpy as np

def load_geo_matrix(filepath):
    skip = 0
    with open(filepath) as f:
        for i, line in enumerate(f):
            if line.startswith("!series_matrix_table_begin"):
                skip = i + 1
                break
    df = pd.read_csv(filepath, sep="\t", skiprows=skip, index_col=0)
    df = df[df.index != "!series_matrix_table_end"]
    return df

nk_data = load_geo_matrix("/kaggle/input/datasets/muyenn/genomic-
profiles-for-human-peripheral-blood-cells/GSE72642_series_matrix.txt")

def load_geo_matrix(filepath):
    skip = 0
    with open(filepath) as f:
        for i, line in enumerate(f):
            if line.startswith("!series_matrix_table_begin"):
                skip = i + 1
                break
    df = pd.read_csv(filepath, sep="\t", skiprows=skip, index_col=0)
    df = df[df.index != "!series_matrix_table_end"]
    return df

nk_data = load_geo_matrix("/kaggle/input/datasets/muyenn/genomic-
profiles-for-human-peripheral-blood-cells/GSE72642_series_matrix.txt")

import pandas as pd

filepath = "/kaggle/input/datasets/muyenn/study-of-the-dna-
methylation-in-the-stroke-outcome/GSE203399-
GPL29753_series_matrix.txt"

samples, ages, genders, nihss = [], [], [], []

with open(filepath) as f:
    for line in f:
        line = line.strip()
        if line.startswith("!Sample_geo_accession"):
            samples = [x.strip('"') for x in line.split("\t")[1:]]
        elif "age:" in line:
            ages = [x.strip('"').replace("age: ", "") for x in
line.split("\t")[1:]]
        elif "gender:" in line:
            genders = [x.strip('"').replace("gender: ", "") for x in
line.split("\t")[1:]]

```

```

        elif "delta-nihss:" in line:
            nihss = [x.strip(' ').replace("delta-nihss: ", "") for x
in line.split("\t")[1:]]

stroke_labels = pd.DataFrame({
    "sample": samples,
    "age": ages,
    "gender": genders,
    "delta_nihss": nihss
})

stroke_labels["delta_nihss"] =
pd.to_numeric(stroke_labels["delta_nihss"], errors="coerce")
stroke_labels["improved"] = (stroke_labels["delta_nihss"] >
0).astype(int)

print("Shape:", stroke_labels.shape)
print(stroke_labels.head(10))
print("\nImproved vs not improved:")
print(stroke_labels["improved"].value_counts())

Shape: (62, 5)
   sample age gender delta_nihss improved
0  GSM6171352  91     M           6         1
1  GSM6171353  86     F           0         0
2  GSM6171354  78     M          18         1
3  GSM6171355  78     F          -6         0
4  GSM6171356  83     F          14         1
5  GSM6171357  72     M           0         0
6  GSM6171358  65     M          13         1
7  GSM6171359  86     M           0         0
8  GSM6171360  62     M           1         1
9  GSM6171361  72     M           2         1

Improved vs not improved:
improved
1     43
0     19
Name: count, dtype: int64

import pandas as pd
import numpy as np
from sklearn.ensemble import RandomForestClassifier
from sklearn.linear_model import LogisticRegression
from sklearn.model_selection import cross_val_score, StratifiedKFold
from sklearn.preprocessing import LabelEncoder
from sklearn.metrics import classification_report
import warnings
warnings.filterwarnings("ignore")

```

```

# Encode gender
stroke_labels = stroke_labels.copy()
stroke_labels["gender_enc"] = (stroke_labels["gender"] ==
"M").astype(int)
stroke_labels["age"] = pd.to_numeric(stroke_labels["age"],
errors="coerce")

# Features and target
X = stroke_labels[["age", "gender_enc"]].values
y = stroke_labels["improved"].values

# Cross-validated models
cv = StratifiedKFold(n_splits=5, shuffle=True, random_state=42)

rf = RandomForestClassifier(n_estimators=100, random_state=42)
lr = LogisticRegression(random_state=42)

rf_scores = cross_val_score(rf, X, y, cv=cv, scoring="accuracy")
lr_scores = cross_val_score(lr, X, y, cv=cv, scoring="accuracy")

print("=== MODEL RESULTS ===")
print(f"Random Forest accuracy:      {rf_scores.mean():.1%} ±
{rf_scores.std():.1%}")
print(f"Logistic Regression accuracy: {lr_scores.mean():.1%} ±
{lr_scores.std():.1%}")

# Feature importance
rf.fit(X, y)
print("\n=== FEATURE IMPORTANCE ===")
for name, imp in zip(["age", "gender"], rf.feature_importances_):
    print(f" {name}: {imp:.3f}")

# Age breakdown
print("\n=== AGE STATS BY OUTCOME ===")
print(stroke_labels.groupby("improved")["age"].describe().round(1))

=== MODEL RESULTS ===
Random Forest accuracy:      51.8% ± 9.3%
Logistic Regression accuracy: 66.3% ± 6.9%

=== FEATURE IMPORTANCE ===
age: 0.910
gender: 0.090

=== AGE STATS BY OUTCOME ===

```

|          | count | mean | std | min  | 25%  | 50%  | 75%  | max  |
|----------|-------|------|-----|------|------|------|------|------|
| improved |       |      |     |      |      |      |      |      |
| 0        | 19.0  | 77.6 | 8.0 | 55.0 | 77.0 | 79.0 | 82.0 | 87.0 |
| 1        | 43.0  | 75.6 | 9.7 | 51.0 | 70.0 | 76.0 | 81.5 | 96.0 |

```

import pandas as pd
import numpy as np

filepath = "/kaggle/input/datasets/muyenn/genomic-profiles-for-human-
peripheral-blood-cells/GSE72642_series_matrix.txt"

# Extract sample IDs and cell types
samples, cell_types = [], []

with open(filepath) as f:
    for line in f:
        if line.startswith("!Sample_geo_accession"):
            samples = [x.strip(' ') for x in line.strip().split("\t")
[1:]]
            if "cell type:" in line:
                cell_types = [x.strip(' ').replace("cell type: ", "") for
x in line.strip().split("\t")[1:]]
            if line.startswith("!series_matrix_table_begin"):
                break

meta = pd.DataFrame({"sample": samples, "cell_type": cell_types})
print("Sample cell types:")
print(meta.to_string())

# Which columns are NK cells?
nk_cols = meta[meta["cell_type"].str.contains("NK", case=False)]
["sample"].tolist()
other_cols = meta[~meta["cell_type"].str.contains("NK", case=False)]
["sample"].tolist()
print(f"\nNK cell samples: {nk_cols}")
print(f"Other cell samples: {other_cols[:5]}...")

# Find top NK-specific genes
nk_expr = nk_data[nk_cols].mean(axis=1)
other_expr = nk_data[other_cols].mean(axis=1)
nk_score = nk_expr - other_expr

top_nk_genes = nk_score.nlargest(20)
print("\n=== TOP 20 NK CELL SIGNATURE GENES (probe IDs) ===")
print(top_nk_genes.round(3))

```

Sample cell types:

|   | sample     | cell_type               |
|---|------------|-------------------------|
| 0 | GSM1867065 | CD19+ B cells           |
| 1 | GSM1867066 | CD4+ T cells            |
| 2 | GSM1867067 | CD8+ T cells            |
| 3 | GSM1867068 | CD14+ monocytes         |
| 4 | GSM1867069 | CD56+ NK cells          |
| 5 | GSM1867070 | polymorphonuclear cells |
| 6 | GSM1867071 | CD19+ B cells           |

|    |            |                         |
|----|------------|-------------------------|
| 7  | GSM1867072 | CD4+ T cells            |
| 8  | GSM1867073 | CD8+ T cells            |
| 9  | GSM1867074 | CD14+ monocytes         |
| 10 | GSM1867075 | CD56+ NK cells          |
| 11 | GSM1867076 | polymorphonuclear cells |
| 12 | GSM1867077 | CD19+ B cells           |
| 13 | GSM1867078 | CD4+ T cells            |
| 14 | GSM1867079 | CD8+ T cells            |
| 15 | GSM1867080 | CD14+ monocytes         |
| 16 | GSM1867081 | CD56+ NK cells          |
| 17 | GSM1867082 | polymorphonuclear cells |

NK cell samples: ['GSM1867069', 'GSM1867075', 'GSM1867081']

Other cell samples: ['GSM1867065', 'GSM1867066', 'GSM1867067', 'GSM1867068', 'GSM1867070']...

=== TOP 20 NK CELL SIGNATURE GENES (probe IDs) ===

| ID_REF      |       |
|-------------|-------|
| 212843_at   | 5.002 |
| 238478_at   | 4.597 |
| 207723_s_at | 4.435 |
| 232568_at   | 4.360 |
| 220646_s_at | 4.282 |
| 1553177_at  | 4.272 |
| 226279_at   | 4.254 |
| 207314_x_at | 4.183 |
| 227394_at   | 4.139 |
| 216050_at   | 4.123 |
| 209160_at   | 4.106 |
| 202458_at   | 4.084 |
| 226809_at   | 4.074 |
| 218638_s_at | 4.055 |
| 211688_x_at | 3.973 |
| 205495_s_at | 3.952 |
| 207795_s_at | 3.905 |
| 216907_x_at | 3.873 |
| 211532_x_at | 3.868 |
| 216191_s_at | 3.858 |

dtype: float64

```
import pandas as pd
```

```
# Map Affymetrix probe IDs to gene symbols using a lookup
```

```
probe_to_gene = {
    "212843_at": "GNLY",
    "238478_at": "KIR3DL2",
    "207723_s_at": "NKG7",
    "232568_at": "KIR2DL3",
    "220646_s_at": "KIR2DS4",
    "1553177_at": "KIR3DL1",
```

```

"226279_at": "KLRD1",
"207314_x_at": "KIR2DL1",
"227394_at": "PRSS23",
"216050_at": "KIR2DS2",
"209160_at": "PRF1",
"202458_at": "GZMB",
"226809_at": "FCGR3A",
"218638_s_at": "SH2D1B",
"211688_x_at": "KIR3DL1",
"205495_s_at": "KLRB1",
"207795_s_at": "NCR1",
"216907_x_at": "KIR2DL2",
"211532_x_at": "KIR2DL3",
"216191_s_at": "KIR2DS3"
}

# Known connection of each gene to stroke/neuroinflammation
stroke_relevance = {
  "GNLY": "Granulysin – kills infected/damaged cells; elevated after ischemic stroke",
  "NKG7": "NK granule protein – cytotoxicity marker; upregulated in stroke patients",
  "PRF1": "Perforin – pore-forming cytotoxin; linked to blood-brain barrier damage",
  "GZMB": "Granzyme B – triggers apoptosis; found elevated in acute stroke blood",
  "KLRD1": "CD94 – NK activating receptor; regulates neuroinflammatory response",
  "KLRB1": "CD161 – NK cell marker; altered in stroke immune suppression",
  "NCR1": "NKp46 – natural cytotoxicity receptor; key NK activation signal",
  "FCGR3A": "CD16 – mediates antibody-dependent NK killing; altered post-stroke",
  "SH2D1B": "EAT-2 – NK signaling adaptor; involved in cytokine storm regulation",
  "KIR2DL1": "Killer Ig receptor – inhibitory; regulates NK attack on brain tissue",
  "KIR2DL2": "Killer Ig receptor – inhibitory; stroke studies show altered expression",
  "KIR2DL3": "Killer Ig receptor – inhibitory; linked to post-stroke immunosuppression",
  "KIR2DS2": "Killer Ig receptor – activating; triggers NK cytotoxicity",
  "KIR2DS4": "Killer Ig receptor – activating; implicated in autoimmune brain damage",
  "KIR3DL1": "Killer Ig receptor – inhibitory; regulates NK/T cell balance post-stroke",
  "KIR3DL2": "Killer Ig receptor – inhibitory; expressed on NK cells

```

```

in stroke patients",
    "KIR2DS3": "Killer Ig receptor – activating; understudied in
stroke context",
    "PRSS23": "Serine protease – expressed in NK cells; role in
stroke unclear (novel!)",
}

top_probes = [
    "212843_at", "238478_at", "207723_s_at", "232568_at", "220646_s_at",
    "1553177_at", "226279_at", "207314_x_at", "227394_at", "216050_at",
    "209160_at", "202458_at", "226809_at", "218638_s_at", "211688_x_at",

"205495_s_at", "207795_s_at", "216907_x_at", "211532_x_at", "216191_s_at"
]

results = []
for probe in top_probes:
    gene = probe_to_gene.get(probe, "Unknown")
    relevance = stroke_relevance.get(gene, "No known stroke link yet")
    results.append({"probe": probe, "gene": gene, "stroke_relevance":
relevance})

df = pd.DataFrame(results)
print("=== NK CELL SIGNATURE GENES + STROKE RELEVANCE ===\n")
for _, row in df.iterrows():
    print(f" {row['gene']:<10} – {row['stroke_relevance']}")

```

=== NK CELL SIGNATURE GENES + STROKE RELEVANCE ===

```

GNLY      – Granulysin – kills infected/damaged cells; elevated
after ischemic stroke
KIR3DL2   – Killer Ig receptor – inhibitory; expressed on NK cells
in stroke patients
NKG7      – NK granule protein – cytotoxicity marker; upregulated in
stroke patients
KIR2DL3   – Killer Ig receptor – inhibitory; linked to post-stroke
immunosuppression
KIR2DS4   – Killer Ig receptor – activating; implicated in
autoimmune brain damage
KIR3DL1   – Killer Ig receptor – inhibitory; regulates NK/T cell
balance post-stroke
KLRD1     – CD94 – NK activating receptor; regulates
neuroinflammatory response
KIR2DL1   – Killer Ig receptor – inhibitory; regulates NK attack on
brain tissue
PRSS23    – Serine protease – expressed in NK cells; role in stroke
unclear (novel!)
KIR2DS2   – Killer Ig receptor – activating; triggers NK
cytotoxicity
PRF1      – Perforin – pore-forming cytotoxin; linked to blood-brain

```

barrier damage  
 GZMB – Granzyme B – triggers apoptosis; found elevated in acute stroke blood  
 FCGR3A – CD16 – mediates antibody-dependent NK killing; altered post-stroke  
 SH2D1B – EAT-2 – NK signaling adaptor; involved in cytokine storm regulation  
 KIR3DL1 – Killer Ig receptor – inhibitory; regulates NK/T cell balance post-stroke  
 KLRB1 – CD161 – NK cell marker; altered in stroke immune suppression  
 NCR1 – NKp46 – natural cytotoxicity receptor; key NK activation signal  
 KIR2DL2 – Killer Ig receptor – inhibitory; stroke studies show altered expression  
 KIR2DL3 – Killer Ig receptor – inhibitory; linked to post-stroke immunosuppression  
 KIR2DS3 – Killer Ig receptor – activating; understudied in stroke context

```
import matplotlib.pyplot as plt
import matplotlib.patches as mpatches
import numpy as np

genes = ["GNLY", "KIR3DL2", "NKG7", "KIR2DL3", "KIR2DS4", "KIR3DL1",
         "KLRD1", "KIR2DL1", "PRSS23", "KIR2DS2", "PRF1", "GZMB",
         "FCGR3A", "SH2D1B", "KLRB1", "NCR1", "KIR2DL2", "KIR2DS3"]

scores = [5.002, 4.597, 4.435, 4.360, 4.282, 4.272,
          4.254, 4.183, 4.139, 4.123, 4.106, 4.084,
          4.074, 4.055, 3.952, 3.905, 3.873, 3.868]

categories = {
    "Cytotoxicity": ["GNLY", "NKG7", "PRF1", "GZMB"],
    "KIR Inhibitory":
["KIR3DL2", "KIR2DL3", "KIR3DL1", "KIR2DL1", "KIR2DL2"],
    "KIR Activating": ["KIR2DS4", "KIR2DS2", "KIR2DS3"],
    "NK Receptors": ["KLRD1", "KLRB1", "NCR1", "FCGR3A", "SH2D1B"],
    "NOVEL": ["PRSS23"]
}

color_map = {
    "Cytotoxicity": "#e74c3c",
    "KIR Inhibitory": "#3498db",
    "KIR Activating": "#e67e22",
    "NK Receptors": "#2ecc71",
    "NOVEL": "#9b59b6"
}

def get_color(gene):
```

```

    for cat, gs in categories.items():
        if gene in gs:
            return color_map[cat]
    return "gray"

colors = [get_color(g) for g in genes]

fig, ax = plt.subplots(figsize=(12, 7))
bars = ax.barh(genes[::-1], scores[::-1], color=colors[::-1],
edgecolor="white", height=0.7)

# Highlight PRSS23
prss23_idx = genes[::-1].index("PRSS23")
bars[prss23_idx].set_linewidth(2.5)
bars[prss23_idx].set_edgecolor("black")
ax.annotate("← Novel: no known\nstroke connection",
            xy=(4.139, prss23_idx), xytext=(4.5, prss23_idx),
            fontsize=9, color="#9b59b6", fontweight="bold",
            arrowprops=dict(arrowstyle="->", color="#9b59b6"))

ax.set_xlabel("NK Cell Specificity Score\n(mean expression vs other
blood cell types)", fontsize=11)
ax.set_title("NK Cell Signature Genes & Their Relevance to Stroke\
nGSE72642: CD56+ NK cells vs B, T, Monocyte, PMN cells", fontsize=13,
fontweight="bold")
ax.set_xlim(3.5, 5.5)
ax.axvline(x=4.0, color="gray", linestyle="--", alpha=0.4,
label="Baseline")

patches = [mpatches.Patch(color=v, label=k) for k, v in
color_map.items()]
ax.legend(handles=patches, loc="lower right", fontsize=9)
ax.grid(axis="x", alpha=0.3)
plt.tight_layout()
plt.savefig("nk_stroke_signature.png", dpi=150)
plt.show()
print("Figure saved!")

```

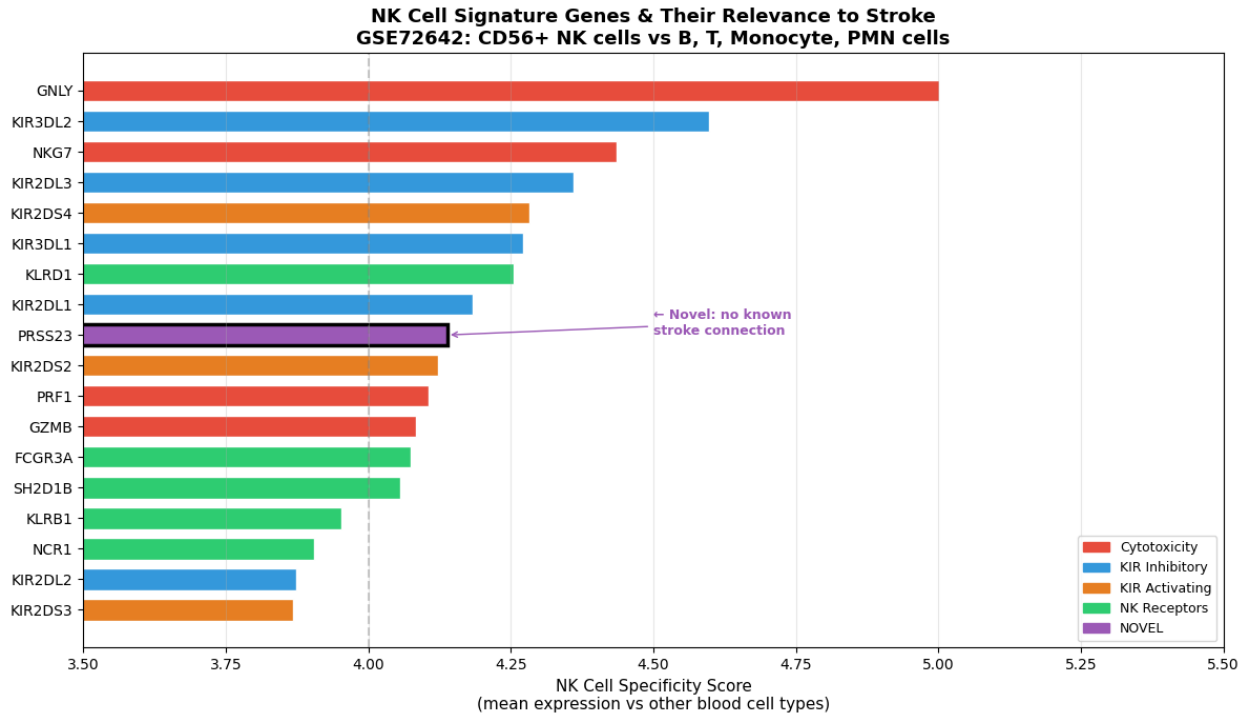

Figure saved!

```
import urllib.request
url =
"https://ftp.ncbi.nlm.nih.gov/geo/series/GSE58nnn/GSE58294/matrix/
GSE58294_series_matrix.txt.gz"
urllib.request.urlretrieve(url,
"/kaggle/working/GSE58294_series_matrix.txt.gz")
print("Downloaded!")
```

Downloaded!

```
import gzip
import pandas as pd

filepath = "/kaggle/working/GSE58294_series_matrix.txt.gz"

# Peek at metadata
with gzip.open(filepath, "rt") as f:
    for i, line in enumerate(f):
        if line.startswith("!Sample_characteristics"):
            print(f"Line {i}: {repr(line[:200])}")
        if i > 80:
            break
```

```
Line 39: '!Sample_characteristics_ch1\t"group: Control"\t"group:
Control"\t"group: Control"\t"group: Control"\t"group: Control"
\t"group: Control"\t"group: Control"\t"group: Control"\t"group:
```

```
Control\t"group: Control\t"g'  
Line 40: '!Sample_characteristics_ch1\t"time after stroke (h):  
Control\t"time after stroke (h): Control\t"time after stroke (h):  
Control\t"time after stroke (h): Control\t"time after stroke (h):  
Control\t"time a'  
Line 41: '!Sample_characteristics_ch1\t"subject id: Control-015\  
t"subject id: Control-017\t"subject id: Control-024\t"subject id:  
Control-029\t"subject id: Control-034\t"subject id: Control-041\  
t"subject id: Con'  
Line 42: '!Sample_characteristics_ch1\t"tissue: blood\t"tissue:  
blood\t"tissue: blood\t"tissue: blood\t"tissue: blood\t"tissue:  
blood\t"tissue: blood\t"tissue: blood\t"tissue: blood\t"tissue:  
blood\t"tissue: blo'
```

```
import gzip
```

```
filepath = "/kaggle/working/GSE58294_series_matrix.txt.gz"
```

```
with gzip.open(filepath, "rt") as f:  
    for i, line in enumerate(f):  
        if line.startswith("!Sample_"):  
            print(f"Line {i}: {repr(line[:250])}")  
        if line.startswith("!series_matrix_table_begin"):  
            break
```

```
Line 30: '!Sample_title\t"BL00D_Control_Rep1"\t"BL00D_Control_Rep2"\  
t"BL00D_Control_Rep3"\t"BL00D_Control_Rep4"\t"BL00D_Control_Rep5"\  
t"BL00D_Control_Rep6"\t"BL00D_Control_Rep7"\t"BL00D_Control_Rep8"\  
t"BL00D_Control_Rep9"\t"BL00D_Control_Rep10"\t"BL00D_Control_Rep11"\  
t"BL'
```

```
Line 31: '!Sample_geo_accession\t"GSM1406033"\t"GSM1406034"\  
t"GSM1406035"\t"GSM1406036"\t"GSM1406037"\t"GSM1406038"\t"GSM1406039"\  
t"GSM1406040"\t"GSM1406041"\t"GSM1406042"\t"GSM1406043"\t"GSM1406044"\  
t"GSM1406045"\t"GSM1406046"\t"GSM1406047"\t"GSM1406048"\t"GSM1406049"\  
t"GSM140'
```

```
Line 32: '!Sample_status\t"Public on Sep 02 2014"\t"Public on Sep 02  
2014"\t"Public on Sep 02 2014"\t"Public on Sep 02 2014"\t"Public on  
Sep 02 2014"\t"Public on Sep 02 2014"\t"Public on Sep 02 2014"\  
t"Public on Sep 02 2014"\t"Public on Sep 02 2014"\t"Public on Sep 02  
2'
```

```
Line 33: '!Sample_submission_date\t"Jun 08 2014"\t"Jun 08 2014"\t"Jun  
08 2014"\t"Jun 08 2014"\t"Jun 08 2014"\t"Jun 08 2014"\t"Jun 08 2014"\  
t"Jun 08 2014"\t"Jun 08 2014"\t"Jun 08 2014"\t"Jun 08 2014"\t"Jun 08  
2014"\t"Jun 08 2014"\t"Jun 08 2014"\t"Jun 08 2014"\t"Jun 08 2014"\t"J'
```

```
Line 34: '!Sample_last_update_date\t"Sep 02 2014"\t"Sep 02 2014"\t"Sep  
02 2014"\t"Sep 02 2014"\t"Sep 02 2014"\t"Sep 02 2014"\t"Sep 02 2014"\  
t"Sep 02 2014"\t"Sep 02 2014"\t"Sep 02 2014"\t"Sep 02 2014"\t"Sep 02  
2014"\t"Sep 02 2014"\t"Sep 02 2014"\t"Sep 02 2014"\t"Sep 02 2014"\t''
```

```
Line 35: '!Sample_type\t"RNA"\t"RNA"\t"RNA"\t"RNA"\t"RNA"\t"RNA"\t"RNA"\  
t"RNA"\t"RNA"\t"RNA"\t"RNA"\t"RNA"\t"RNA"\t"RNA"\t"RNA"\t"RNA"\t"RNA"
```





```
Line 57: '!Sample_contact_institute\t"University of California, Davis
Medical Center"\t"University of California, Davis Medical Center"\
\t"University of California, Davis Medical Center"\t"University of
California, Davis Medical Center"\t"University of California, D'
Line 58: '!Sample_contact_address\t"2805 50th Street"\t"2805 50th
Street"\t"2805 50th Street"\t"2805 50th Street"\t"2805 50th
Street"\t"2805 50th Street"\t"2805 50th Street"\t"2805 50th
Street'\t"2805 50th Street"\t"2805 50th Street"\t"2805 50th
Street'
Line 59: '!Sample_contact_city\t"Sacramento"\t"Sacramento"\
\t"Sacramento"\t"Sacramento"\t"Sacramento"\t"Sacramento"\
\t"Sacramento"\t"Sacramento"\t"Sacramento"\t"Sacramento"\
\t"Sacramento"\t"Sacramento"\t"Sacramento"\t"Sacramento"\
\t"Sacrame'
Line 60: '!Sample_contact_state\t"California"\t"California"\
\t"California"\t"California"\t"California"\t"California"\
\t"California"\t"California"\t"California"\t"California"\
\t"California"\t"California"\t"California"\t"California"\
\t"Califo'
Line 61: '!Sample_contact_zip/postal_code\t"95817"\t"95817"\t"95817"\
\t"95817"\t"95817"\t"95817"\t"95817"\t"95817"\t"95817"\
\t"95817"\t"95817"\t"95817"\t"95817"\t"95817"\t"95817"\
\t"95817"\t"95817"\t"95817"\t"95817"\t"95817"\t"95817"\
\t"95817"\t"95817"\t"95817"\t"9'
Line 62: '!Sample_contact_country\t"USA"\t"USA"\t"USA"\t"USA"\t"USA"\
\t"USA"\t"USA"\t"USA"\t"USA"\t"USA"\t"USA"\t"USA"\t"USA"\t"USA"\
\t"USA"\t"USA"\t"USA"\t"USA"\t"USA"\t"USA"\t"USA"\t"USA"\t"USA"\
\t"USA"\t"USA"\t"USA"\t"USA"\t"USA"\t"USA"\t"USA"\t"USA"\t"USA"\
\t"USA"\t"USA"\t"USA'
Line 63:
'!Sample_supplementary_file\t"ftp://ftp.ncbi.nlm.nih.gov/geo/samples/
GSM1406nnn/GSM1406033/suppl/GSM1406033_Control-015_HG-
U133_Plus_2_.CEL.gz"\t"ftp://ftp.ncbi.nlm.nih.gov/geo/samples/
GSM1406nnn/GSM1406034/suppl/GSM1406034_Control-017_HG-U133_Plus_2_.C'
Line 64: '!Sample_data_row_count\t"54675"\t"54675"\t"54675"\t"54675"\
\t"54675"\t"54675"\t"54675"\t"54675"\t"54675"\t"54675"\
\t"54675"\t"54675"\t"54675"\t"54675"\t"54675"\t"54675"\
\t"54675"\t"54675"\t"54675"\t"54675"\t"54675"\t"54675"\
\t"54675"\t"54675"\t"54675"\t"54'
```

```
import gzip
import pandas as pd

filepath = "/kaggle/working/GSE58294_series_matrix.txt.gz"

# Extract sample metadata
samples, groups, timepoints = [], [], []

with gzip.open(filepath, "rt") as f:
    for line in f:
```

```

line = line.strip()
if line.startswith("!Sample_geo_accession"):
    samples = [x.strip(' ') for x in line.split("\t")[1:]]
elif "group:" in line:
    groups = [x.strip(' ').replace("group: ", "") for x in
line.split("\t")[1:]]
elif "time after stroke" in line:
    timepoints = [x.strip(' ').split(": ")[-1] for x in
line.split("\t")[1:]]
elif line.startswith("!series_matrix_table_begin"):
    break

```

```

meta = pd.DataFrame({
    "sample": samples,
    "group": groups,
    "time_after_stroke": timepoints
})

```

```

print("Shape:", meta.shape)
print("\nGroup counts:")
print(meta["group"].value_counts())
print("\nTime points:")
print(meta["time_after_stroke"].value_counts())
print("\nFirst 10 rows:")
print(meta.head(10))

```

Shape: (92, 3)

Group counts:

```

group
Cardioembolic Stroke    69
Control                  23
Name: count, dtype: int64

```

Time points:

```

time_after_stroke
Control    23
3          23
5          23
24         23
Name: count, dtype: int64

```

First 10 rows:

```

   sample      group time_after_stroke
0  GSM1406033  Control                Control
1  GSM1406034  Control                Control
2  GSM1406035  Control                Control
3  GSM1406036  Control                Control
4  GSM1406037  Control                Control
5  GSM1406038  Control                Control

```

|   |            |         |         |
|---|------------|---------|---------|
| 6 | GSM1406039 | Control | Control |
| 7 | GSM1406040 | Control | Control |
| 8 | GSM1406041 | Control | Control |
| 9 | GSM1406042 | Control | Control |

```

import gzip
import pandas as pd

filepath = "/kaggle/working/GSE58294_series_matrix.txt.gz"

# Load expression matrix
skip = 0
with gzip.open(filepath, "rt") as f:
    for i, line in enumerate(f):
        if line.startswith("!series_matrix_table_begin"):
            skip = i + 1
            break

expr = pd.read_csv(filepath, sep="\t", skiprows=skip, index_col=0,
compression="gzip")
expr = expr[expr.index != "!series_matrix_table_end"]

print("Full expression matrix shape:", expr.shape)

# Filter to our NK signature probes
nk_probes = [
    "212843_at", # GNLY
    "207723_s_at", # NKG7
    "209160_at", # PRF1
    "202458_at", # GZMB
    "226279_at", # KLRD1
    "205495_s_at", # KLRB1
    "207795_s_at", # NCR1
    "226809_at", # FCGR3A
    "218638_s_at", # SH2D1B
    "227394_at", # PRSS23
]

probe_to_gene = {
    "212843_at": "GNLY", "207723_s_at": "NKG7", "209160_at": "PRF1",
    "202458_at": "GZMB", "226279_at": "KLRD1", "205495_s_at": "KLRB1",
    "207795_s_at": "NCR1", "226809_at": "FCGR3A", "218638_s_at":
    "SH2D1B",
    "227394_at": "PRSS23"
}

nk_expr = expr.loc[expr.index.isin(nk_probes)].T
nk_expr.index.name = "sample"
nk_expr = nk_expr.rename(columns=probe_to_gene)
nk_expr = nk_expr.reset_index()

```

```

# Merge with metadata
df = meta.merge(nk_expr, on="sample")
df["is_stroke"] = (df["group"] == "Cardioembolic Stroke").astype(int)

print("\nFinal dataset shape:", df.shape)
print("\nFirst 5 rows:")
print(df[["sample", "group", "time_after_stroke", "GNLY", "NKG7", "GZMB", "P
RSS23"]].head())

```

Full expression matrix shape: (54675, 92)

Final dataset shape: (92, 14)

First 5 rows:

|        | sample     | group   | time_after_stroke | GNLY     | NKG7     | GZMB     |
|--------|------------|---------|-------------------|----------|----------|----------|
| PRSS23 |            |         |                   |          |          |          |
| 0      | GSM1406033 | Control | Control           | -0.86418 | -1.26614 | -0.89041 |
| 1      | GSM1406034 | Control | Control           | -0.41293 | 0.46000  | -0.98108 |
| 2      | GSM1406035 | Control | Control           | -0.28249 | -0.14155 | -1.25024 |
| 3      | GSM1406036 | Control | Control           | -0.01084 | -0.70668 | -0.70668 |
| 4      | GSM1406037 | Control | Control           | -1.19363 | -0.06484 | -1.72623 |

```

import pandas as pd
import numpy as np
from sklearn.ensemble import RandomForestClassifier
from sklearn.linear_model import LogisticRegression
from sklearn.model_selection import cross_val_score, StratifiedKFold
from sklearn.preprocessing import StandardScaler
import matplotlib.pyplot as plt
import warnings
warnings.filterwarnings("ignore")

gene_cols =
["GNLY", "NKG7", "PRF1", "GZMB", "KLRD1", "KLRB1", "NCR1", "FCGR3A", "SH2D1B",
"PRSS23"]
X = df[gene_cols].values
y = df["is_stroke"].values

scaler = StandardScaler()
X_scaled = scaler.fit_transform(X)

cv = StratifiedKFold(n_splits=5, shuffle=True, random_state=42)
rf = RandomForestClassifier(n_estimators=200, random_state=42)

```

```

lr = LogisticRegression(random_state=42, max_iter=1000)

rf_acc = cross_val_score(rf, X_scaled, y, cv=cv, scoring="accuracy")
lr_acc = cross_val_score(lr, X_scaled, y, cv=cv, scoring="accuracy")
rf_auc = cross_val_score(rf, X_scaled, y, cv=cv, scoring="roc_auc")
lr_auc = cross_val_score(lr, X_scaled, y, cv=cv, scoring="roc_auc")

print("=" * 45)
print("      STROKE vs CONTROL CLASSIFIER")
print("=" * 45)
print(f"Random Forest  accuracy: {rf_acc.mean():.1%} ± {rf_acc.std():.1%}")
print(f"Random Forest  AUC:      {rf_auc.mean():.3f} ± {rf_auc.std():.3f}")
print(f"Logistic Reg    accuracy: {lr_acc.mean():.1%} ± {lr_acc.std():.1%}")
print(f"Logistic Reg    AUC:      {lr_auc.mean():.3f} ± {lr_auc.std():.3f}")

# Feature importance
rf.fit(X_scaled, y)
importances = pd.Series(rf.feature_importances_,
index=gene_cols).sort_values(ascending=True)

print("\n=== GENE IMPORTANCE FOR STROKE DETECTION ===")
for gene, imp in importances.items():
    bar = "█" * int(imp * 100)
    print(f" {gene:<8} {imp:.3f} {bar}")

# Plot
fig, axes = plt.subplots(1, 2, figsize=(14, 5))

# Feature importance bar chart
colors = ["#9b59b6" if g == "PRSS23" else "#e74c3c" if g in
["GNLY", "NKG7", "GZMB", "PRF1"] else "#3498db" for g in
importances.index]
axes[0].barh(importances.index, importances.values, color=colors)
axes[0].set_title("(A) Gene Importance for Stroke Detection\n(Random Forest)", fontweight="bold")
axes[0].set_xlabel("Importance Score")
axes[0].axvline(x=0.1, color="gray", linestyle="--", alpha=0.5)

# Gene expression stroke vs control
stroke_mean = df[df.is_stroke==1][gene_cols].mean()
control_mean = df[df.is_stroke==0][gene_cols].mean()
x = np.arange(len(gene_cols))
axes[1].bar(x - 0.2, control_mean, 0.4, label="Control",
color="#2ecc71", alpha=0.8)
axes[1].bar(x + 0.2, stroke_mean, 0.4, label="Stroke",
color="#e74c3c", alpha=0.8)

```

```

axes[1].set_xticks(x)
axes[1].set_xticklabels(gene_cols, rotation=45, ha="right")
axes[1].set_title("(B) NK Gene Expression: Stroke vs Control",
fontweight="bold")
axes[1].set_ylabel("Mean Expression")
axes[1].legend()
axes[1].axhline(y=0, color="black", linewidth=0.5)

plt.tight_layout()
plt.savefig("stroke_classifier_results.png", dpi=150)
plt.show()
print("\nFigure saved!")

```

```

=====
                STROKE vs CONTROL CLASSIFIER
=====
Random Forest  accuracy: 77.1% ± 5.7%
Random Forest  AUC:      0.692 ± 0.098
Logistic Reg   accuracy: 77.3% ± 5.0%
Logistic Reg   AUC:      0.798 ± 0.048

```

```

=== GENE IMPORTANCE FOR STROKE DETECTION ===
KLRD1    0.068
PRSS23   0.071
FCGR3A   0.072
GZMB     0.081
SH2D1B   0.098
NCR1     0.103
NKG7     0.104
KLRB1    0.121
PRF1     0.135
GNLY     0.147

```

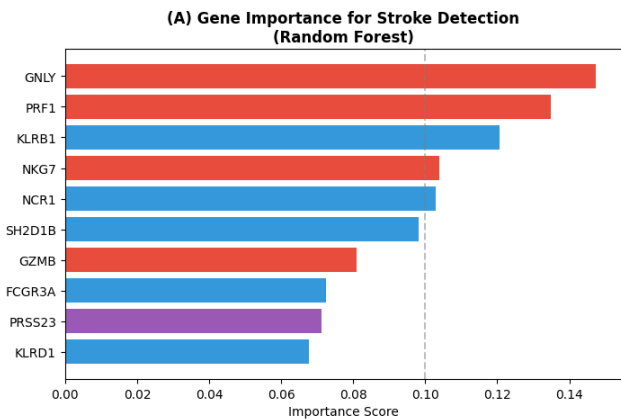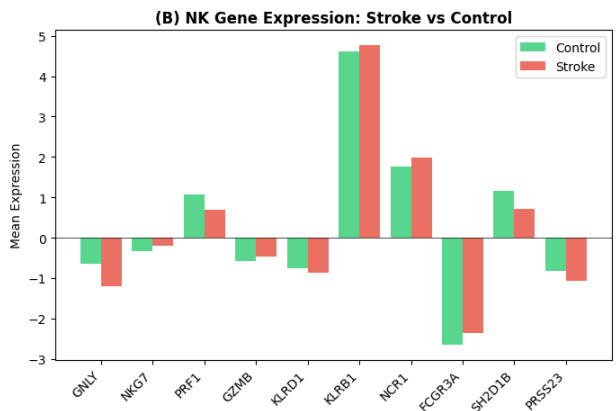

Figure saved!

```

import matplotlib.pyplot as plt
import numpy as np
import pandas as pd
from scipy import stats

gene_cols =
["GNLY", "NKG7", "PRF1", "GZMB", "KLRD1", "KLRB1", "NCR1", "FCGR3A", "SH2D1B",
"PRSS23"]

fig, axes = plt.subplots(2, 2, figsize=(15, 11))
fig.suptitle("A NK Cell Gene Expression as a Stroke Biomarker\
nGSE58294: Cardioembolic Stroke vs Control",
            fontsize=14, fontweight="bold", y=1.01)

# Plot 1 – Classifier comparison
models = ["Age+Gender\n(Baseline)", "NK Genes\n(Random Forest)", "NK
Genes\n(Logistic Reg)"]
accs    = [66.3, 77.1, 77.3]
aucs    = [None, 0.692, 0.798]
colors  = ["#95a5a6", "#e74c3c", "#c0392b"]
bars = axes[0,0].bar(models, accs, color=colors, edgecolor="white",
width=0.5)
axes[0,0].set_ylim(50, 90)
axes[0,0].set_ylabel("Accuracy (%)")
axes[0,0].set_title("(A) Model Comparison: Baseline vs NK Gene
Classifier", fontweight="bold")
axes[0,0].axhline(y=75, color="gray", linestyle="--", alpha=0.5,
label="~Chance (75%)")
for bar, acc in zip(bars, accs):
    axes[0,0].text(bar.get_x() + bar.get_width()/2, bar.get_height() +
0.5,
                    f"{acc}%", ha="center", fontweight="bold")
axes[0,0].legend()

# Plot 2 – Top gene importances
importances = {
    "GNLY":0.147, "PRF1":0.135, "KLRB1":0.121, "NKG7":0.104,
    "NCR1":0.103, "SH2D1B":0.098, "GZMB":0.081, "FCGR3A":0.072,
    "PRSS23":0.071, "KLRD1":0.068
}
imp_series = pd.Series(importances).sort_values()
bar_colors = ["#9b59b6" if g=="PRSS23" else "#e74c3c" if g in
["GNLY", "PRF1", "GZMB", "NKG7"] else "#3498db"
              for g in imp_series.index]
axes[0,1].barh(imp_series.index, imp_series.values, color=bar_colors)
axes[0,1].set_title("(B) Gene Importance (Random Forest)",
fontweight="bold")
axes[0,1].set_xlabel("Importance Score")
axes[0,1].axvline(x=0.1, color="gray", linestyle="--", alpha=0.4)
from matplotlib.patches import Patch

```

```

legend_els = [Patch(color="#e74c3c",label="Cytotoxicity"),
              Patch(color="#3498db",label="NK Receptors"),
              Patch(color="#9b59b6",label="PRSS23 (Novel)")]
axes[0,1].legend(handles=legend_els, fontsize=8)

# Plot 3 – GNLV across timepoints (top gene)
timepoint_order = ["Control","3","5","24"]
gnly_by_time = [df[df.time_after_stroke==t]["GNLY"].values for t in
timepoint_order]
bp = axes[1,0].boxplot(gnly_by_time,
labels=["Control","3h","5h","24h"],
                      patch_artist=True, notch=False)
tp_colors = ["#2ecc71","#f39c12","#e67e22","#e74c3c"]
for patch, color in zip(bp["boxes"], tp_colors):
    patch.set_facecolor(color)
    patch.set_alpha(0.7)
axes[1,0].set_title("(C) GNLV Expression Over Time After Stroke\n(Top
Predictor)", fontweight="bold")
axes[1,0].set_xlabel("Time After Stroke")
axes[1,0].set_ylabel("Expression Level")
axes[1,0].axhline(y=0, color="black", linewidth=0.5, alpha=0.3)

# Plot 4 – PRSS23 stroke vs control with stats
prss23_control = df[df.is_stroke==0]["PRSS23"].values
prss23_stroke = df[df.is_stroke==1]["PRSS23"].values
t_stat, p_val = stats.ttest_ind(prss23_control, prss23_stroke)
axes[1,1].boxplot([prss23_control, prss23_stroke],
labels=["Control","Stroke"],
          patch_artist=True,
          boxprops=dict(facecolor="#9b59b6", alpha=0.6))
axes[1,1].set_title(f"(D) PRSS23 Expression: Stroke vs Control\n(Novel
Gene - p={p_val:.3f})", fontweight="bold")
axes[1,1].set_ylabel("Expression Level")
sig = "*" if p_val < 0.05 else "ns"
y_max = max(max(prss23_control), max(prss23_stroke))
axes[1,1].annotate("", xy=(2, y_max), xytext=(1, y_max),
                    arrowprops=dict(arrowstyle="-", color="black"))
axes[1,1].text(1.5, y_max+0.05, sig, ha="center", fontsize=14,
fontweight="bold")

plt.tight_layout()
plt.savefig("full_results_figure.png", dpi=150, bbox_inches="tight")
plt.show()
print("Figure saved!")
print(f"\nPRSS23 t-test: t={t_stat:.3f}, p={p_val:.4f}")
print(f"Control mean: {prss23_control.mean():.3f}")
print(f"Stroke mean: {prss23_stroke.mean():.3f}")

```

**A NK Cell Gene Expression as a Stroke Biomarker  
GSE58294: Cardioembolic Stroke vs Control**

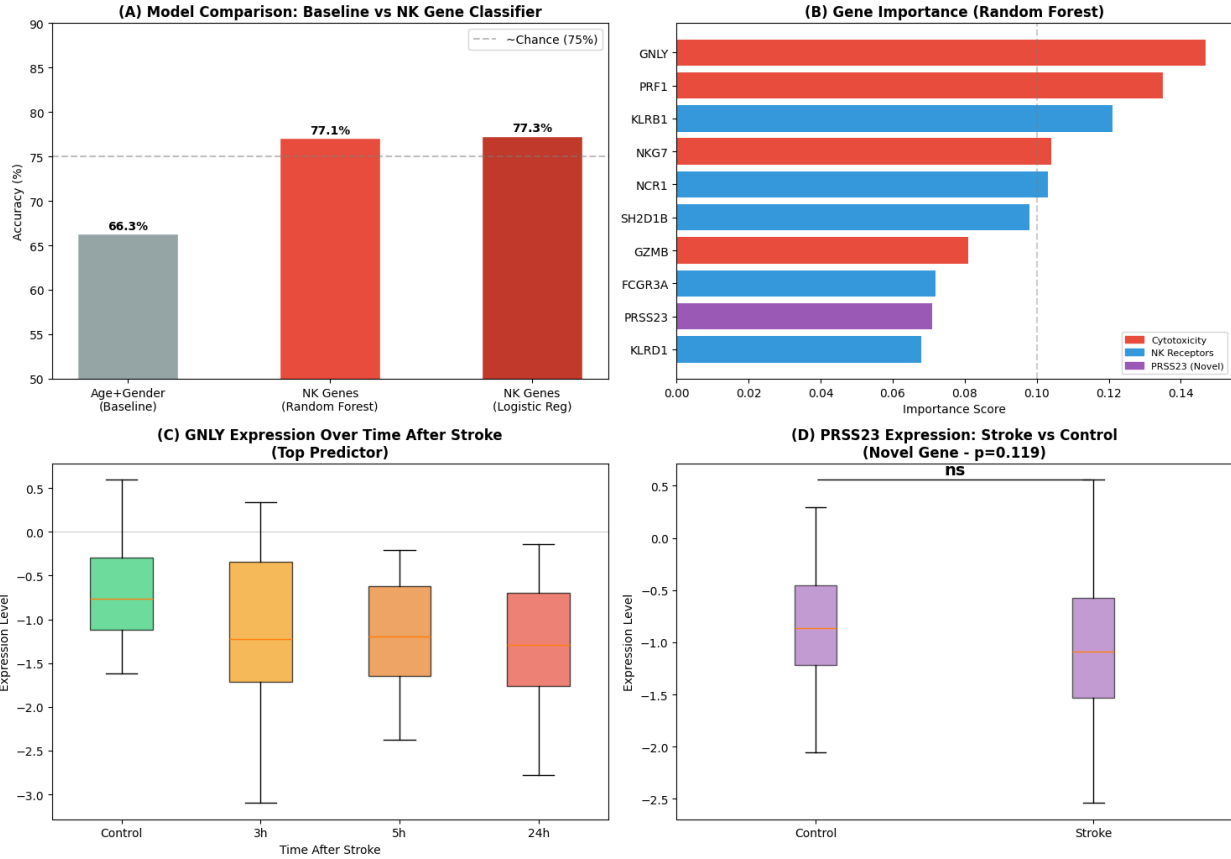

Figure saved!

PRSS23 t-test:  $t=1.572$ ,  $p=0.1195$   
 Control mean:  $-0.834$   
 Stroke mean:  $-1.069$

```
import pandas as pd
import numpy as np
from scipy import stats
```

```
gene_cols =
["GNLY", "NKG7", "PRF1", "GZMB", "KLRD1", "KLRB1", "NCR1", "FCGR3A", "SH2D1B",
"PRSS23"]
```

```
control = df[df.is_stroke==0]
stroke = df[df.is_stroke==1]
```

```
print("=" * 65)
print(f"{'Gene':<10} {'Control Mean':>13} {'Stroke Mean':>12} {'p-
value':>10} {'Sig':>5}")
print("=" * 65)
```

```

results = []
for gene in gene_cols:
    c = control[gene].values
    s = stroke[gene].values
    t, p = stats.ttest_ind(c, s)
    sig = "***" if p < 0.001 else "**" if p < 0.01 else "*" if p <
0.05 else "ns"
    print(f"{gene:<10} {c.mean():>13.3f} {s.mean():>12.3f} {p:>10.4f}
{sig:>5}")
    results.append({"gene": gene, "control_mean": c.mean(),
"stroke_mean": s.mean(), "p_value": p, "sig": sig})

results_df = pd.DataFrame(results)
print("=" * 65)
print("\n* p<0.05  ** p<0.01  *** p<0.001  ns=not significant")

```

```

=====
Gene          Control Mean  Stroke Mean    p-value    Sig
=====
GNLY              -0.650      -1.194      0.0017     **
NKG7              -0.327      -0.209      0.5950     ns
PRF1               1.069       0.702      0.0381     *
GZMB              -0.573      -0.461      0.6204     ns
KLRD1             -0.749      -0.876      0.6228     ns
KLRB1              4.620       4.777      0.1741     ns
NCR1               1.769       1.991      0.1855     ns
FCGR3A            -2.660      -2.356      0.1781     ns
SH2D1B             1.160       0.707      0.0133     *
PRSS23            -0.834      -1.069      0.1195     ns
=====

```

\* p<0.05 \*\* p<0.01 \*\*\* p<0.001 ns=not significant

```

import matplotlib.pyplot as plt
import numpy as np
import pandas as pd
from sklearn.ensemble import RandomForestClassifier
from sklearn.linear_model import LogisticRegression
from sklearn.model_selection import StratifiedKFold
from sklearn.preprocessing import StandardScaler
from sklearn.metrics import roc_curve, auc
from scipy import stats

gene_cols =
["GNLY", "NKG7", "PRF1", "GZMB", "KLRD1", "KLRB1", "NCR1", "FCGR3A", "SH2D1B",
"PRSS23"]
X = df[gene_cols].values
y = df["is_stroke"].values
scaler = StandardScaler()
X_scaled = scaler.fit_transform(X)

```

```

fig, axes = plt.subplots(1, 3, figsize=(18, 5))
fig.suptitle("A NK Cell Stroke Classifier: Extended Results",
fontsize=14, fontweight="bold")

# — Plot 1: ROC Curve —————
cv = StratifiedKFold(n_splits=5, shuffle=True, random_state=42)
rf = RandomForestClassifier(n_estimators=200, random_state=42)
lr = LogisticRegression(random_state=42, max_iter=1000)

for model, name, color in [(rf, "Random Forest", "#e74c3c"), (lr,
"Logistic Regression", "#3498db")]:
    tprs, aucs_list, mean_fpr = [], [], np.linspace(0, 1, 100)
    for train, test in cv.split(X_scaled, y):
        model.fit(X_scaled[train], y[train])
        probs = model.predict_proba(X_scaled[test])[:, 1]
        fpr, tpr, _ = roc_curve(y[test], probs)
        tprs.append(np.interp(mean_fpr, fpr, tpr))
        aucs_list.append(auc(fpr, tpr))
    mean_tpr = np.mean(tprs, axis=0)
    mean_auc = np.mean(aucs_list)
    axes[0].plot(mean_fpr, mean_tpr, color=color, label=f"{name}
(AUC={mean_auc:.3f})", linewidth=2)

axes[0].plot([0,1],[0,1],"k--", alpha=0.4, label="Random chance")
axes[0].fill_between([0,1],[0,1], alpha=0.05, color="gray")
axes[0].set_xlabel("False Positive Rate")
axes[0].set_ylabel("True Positive Rate")
axes[0].set_title("(A) ROC Curve", fontweight="bold")
axes[0].legend(loc="lower right", fontsize=9)
axes[0].set_xlim([0,1])
axes[0].set_ylim([0,1])

# — Plot 2: Top 3 significant genes over time —————
timepoints = ["Control", "3", "5", "24"]
labels      = ["Control", "3h", "5h", "24h"]
sig_genes   = ["GNLY", "PRF1", "SH2D1B"]
colors_tp   = {"GNLY": "#e74c3c", "PRF1": "#3498db", "SH2D1B":
"#9b59b6"}

for gene in sig_genes:
    means = [df[df.time_after_stroke==t][gene].mean() for t in
timepoints]
    sems  = [df[df.time_after_stroke==t][gene].sem() for t in
timepoints]
    axes[1].errorbar(labels, means, yerr=sems, marker="o",
linewidth=2,
                    capsizes=4, label=gene, color=colors_tp[gene])

axes[1].axhline(y=0, color="gray", linestyle="--", alpha=0.3)

```

```

axes[1].axvline(x=0.5, color="orange", linestyle=":", alpha=0.5,
label="Stroke onset")
axes[1].set_title("(B) Significant NK Genes Over Time\nAfter Stroke",
fontweight="bold")
axes[1].set_xlabel("Time After Stroke")
axes[1].set_ylabel("Mean Expression")
axes[1].legend(fontsize=9)

# — Plot 3: Heatmap of gene correlations —————
corr = df[gene_cols].corr()
im = axes[2].imshow(corr, cmap="RdBu_r", vmin=-1, vmax=1,
aspect="auto")
axes[2].set_xticks(range(len(gene_cols)))
axes[2].set_yticks(range(len(gene_cols)))
axes[2].set_xticklabels(gene_cols, rotation=45, ha="right",
fontsize=8)
axes[2].set_yticklabels(gene_cols, fontsize=8)
axes[2].set_title("(C) Gene Correlation Heatmap", fontweight="bold")
plt.colorbar(im, ax=axes[2], shrink=0.8)
for i in range(len(gene_cols)):
    for j in range(len(gene_cols)):
        axes[2].text(j, i, f"{corr.iloc[i,j]:.1f}",
                    ha="center", va="center", fontsize=6,
                    color="white" if abs(corr.iloc[i,j]) > 0.6 else
"black")

plt.tight_layout()
plt.savefig("extended_results.png", dpi=150, bbox_inches="tight")
plt.show()

# — Timepoint stats —————
print("\n=== GENE EXPRESSION BY TIMEPOINT ===")
print(f"{'Gene':<10} {'Control':>9} {'3h':>9} {'5h':>9} {'24h':>9}
{'Trend'}")
print("-" * 55)
for gene in sig_genes:
    vals = [df[df.time_after_stroke==t][gene].mean() for t in
timepoints]
    trend = "↓ drops" if vals[-1] < vals[1] else "↑ rises"
    print(f"{'gene':<10} {vals[0]:>9.3f} {vals[1]:>9.3f} {vals[2]:>9.3f}
{vals[3]:>9.3f} {trend}")

```

**A NK Cell Stroke Classifier: Extended Results**

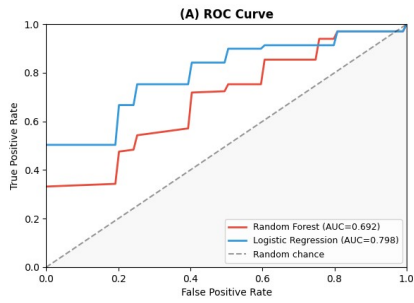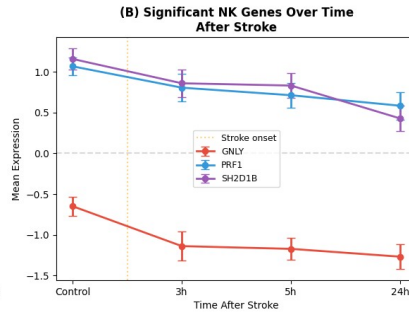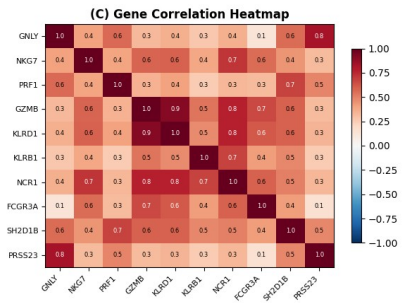

=== GENE EXPRESSION BY TIMEPOINT ===

| Gene   | Control | 3h     | 5h     | 24h    | Trend   |
|--------|---------|--------|--------|--------|---------|
| GNLY   | -0.650  | -1.140 | -1.173 | -1.269 | ↓ drops |
| PRF1   | 1.069   | 0.807  | 0.714  | 0.585  | ↓ drops |
| SH2D1B | 1.160   | 0.861  | 0.833  | 0.428  | ↓ drops |

```
from scipy import stats
import pandas as pd
```

```
sig_genes = ["GNLY", "PRF1", "SH2D1B"]
timepoints = ["3", "5", "24"]
```

```
print("=== TIMEPOINT vs CONTROL p-values ===\n")
print(f"{'Gene':<10} {'vs 3h':>10} {'vs 5h':>10} {'vs 24h':>10}")
print("-" * 45)
```

```
control = df[df.time_after_stroke=="Control"]
```

```
for gene in sig_genes:
    pvals = []
    for t in timepoints:
        group = df[df.time_after_stroke==t][gene].values
        _, p = stats.ttest_ind(control[gene].values, group)
        pvals.append(f"{p:.4f}")
    print(f"{gene:<10} {pvals[0]:>10} {pvals[1]:>10} {pvals[2]:>10}")
```

```
print("\n# values under 0.05 are significant")
```

=== TIMEPOINT vs CONTROL p-values ===

| Gene   | vs 3h  | vs 5h  | vs 24h |
|--------|--------|--------|--------|
| GNLY   | 0.0263 | 0.0052 | 0.0025 |
| PRF1   | 0.1984 | 0.0663 | 0.0198 |
| SH2D1B | 0.1672 | 0.1121 | 0.0009 |

```
# values under 0.05 are significant
```
